# Supplementary material for: Revealing the surface oxidation mechanism and performance evolution of Nd–Fe–B sintered magnets
Source: Royal Society of Chemistry journal article supplement (doi:10.1039/d4tc03843f), 2025-01-01
Supplement: d4tc03843f1.pdf [file d4tc03843f1.pdf]

## Supplementary information

### Revealing the surface oxidation mechanism and performance evolution of Nd-Fe-B sintered magnets

Liang Zhou<sup>a</sup>, Jiaying Jin<sup>a,b,\*</sup>, Wang Chen<sup>a,b</sup>, Shaoqing Ren<sup>a,b</sup>, Mengfan Bu<sup>a</sup>, Xu Li<sup>a</sup>, Bo Xin<sup>b</sup>, Chen Wu<sup>a</sup>, and Mi Yan<sup>a,b,\*</sup>

<sup>a</sup>*School of Materials Science and Engineering, State Key Laboratory of Silicon and Advanced Semiconductor Materials, Key Laboratory of Novel Materials for Information Technology of Zhejiang Province, Zhejiang University, Hangzhou 310027, China*

<sup>b</sup>*State Key Laboratory of Baiyunobo Rare Earth Resource Researches and Comprehensive Utilization, Baotou Research Institution of Rare Earths, Baotou 014030, China*

\**Corresponding authors.* jinjy@zju.edu.cn (J. Jin); mse\_yanmi@zju.edu.cn (M. Yan)

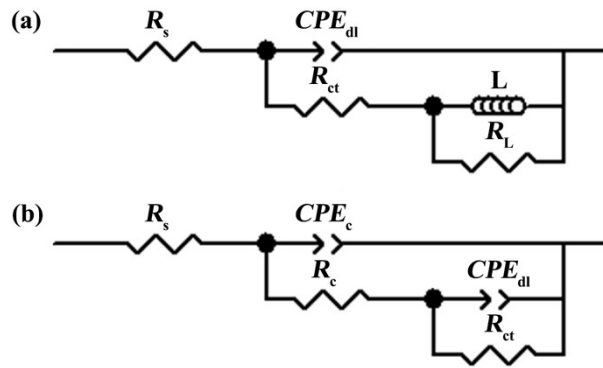

**Fig. S1** Electrochemical equivalent circuit in impedance measurement for (a) the original Nd-Fe-B magnet, and (b) the oxidized magnets.

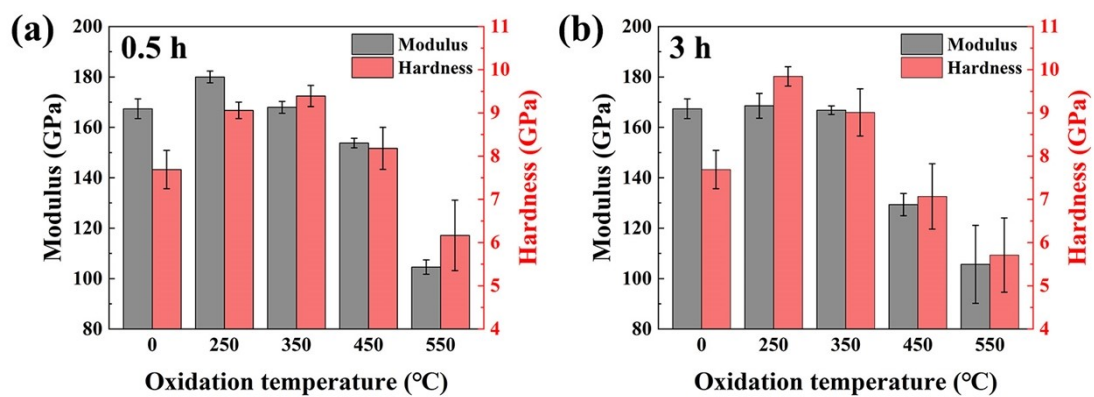

**Fig. S2** Mechanical performance of (a) 0.5 h and (b) 3 h oxidized Nd-Fe-B magnets as a function of oxidation temperature, including Modulus and Hardness.

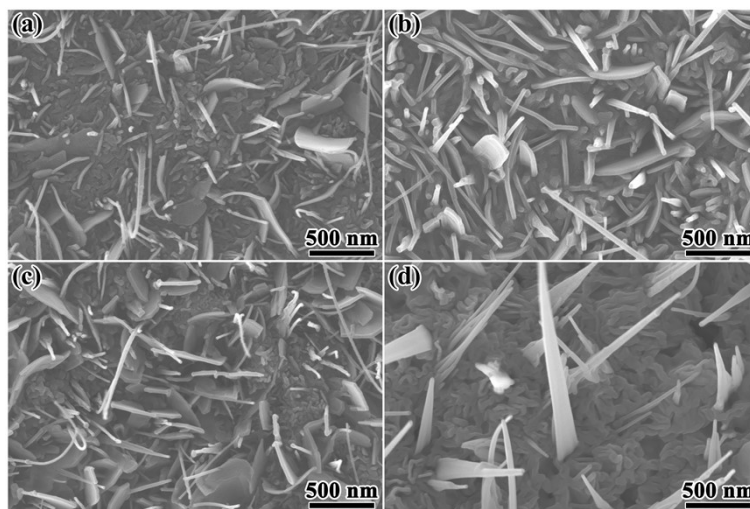

**Fig. S3** Surface morphologies of (a) 550 °C-0.5 h, (b) 550 °C-3 h, (c) 650 °C-0.5 h and (d) 650 °C-3 h oxidized Nd-Fe-B magnets.

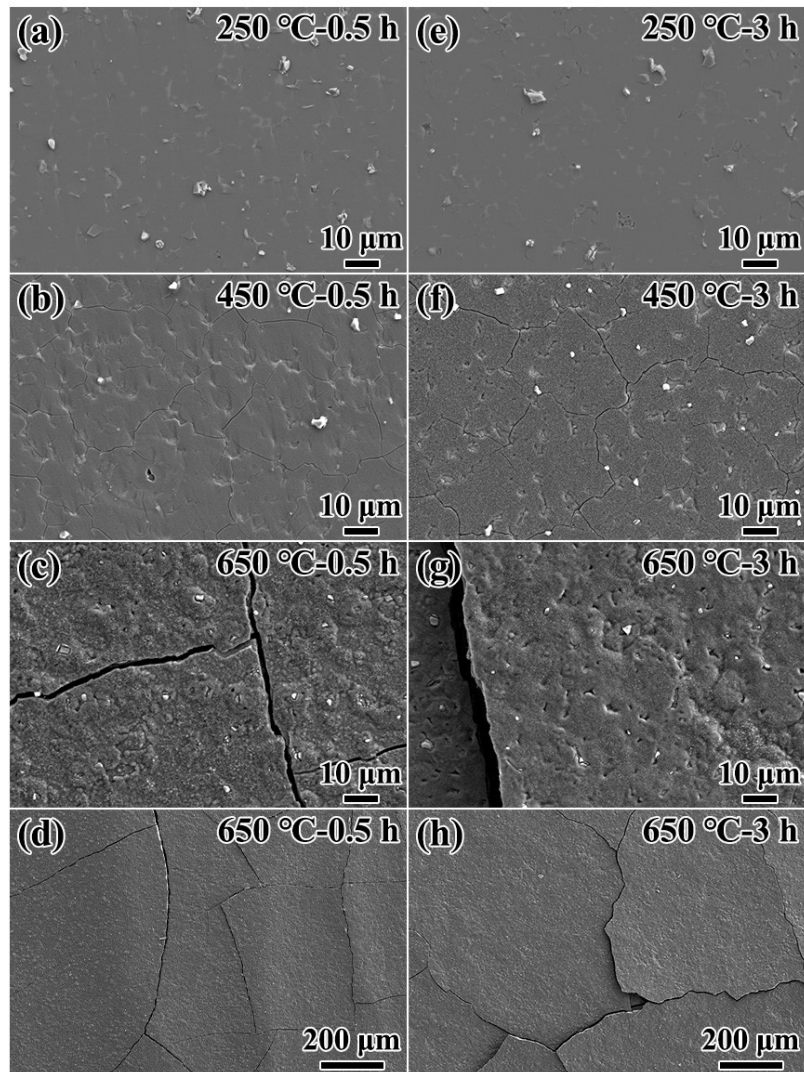

**Fig. S4** Low-magnification surface morphologies of (a-d) 0.5 h and (e-f) 3 h oxidized Nd-Fe-B magnets at different temperatures: (a) 250 °C-0.5 h, (b) 450 °C-0.5 h, (c, d) 650 °C-0.5 h, (e) 250 °C-3 h, (f) 450 °C-3 h and (g, h) 650 °C-3 h.

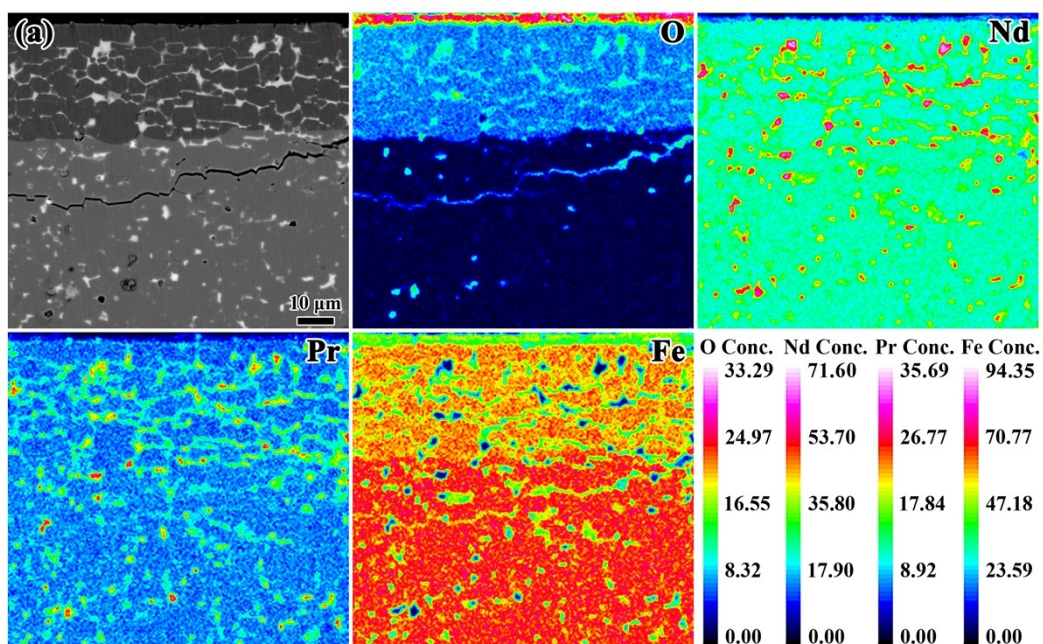

**Fig. S5** Cross-sectional BSE SEM image and corresponding EPMA elemental mappings of the 650 °C-0.5 h oxidized magnet.

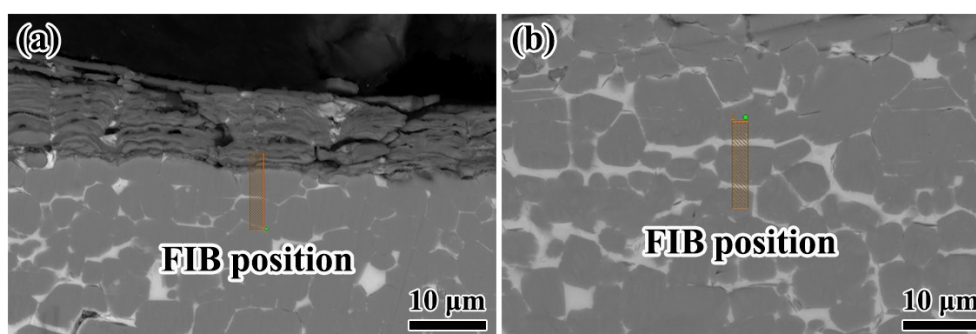

**Fig. S6** Focused ion beam-assisted preparation of the TEM sample from the different areas in the 650 °C-3 h oxidized magnet. (a) Region of interest (ROI 1) from the interface between the outermost surface zone A and the internal oxidation zone B in **Fig. 7(a)**. (b) ROI 2 of the continuous and coarse grain boundary in the internal oxidation layer.

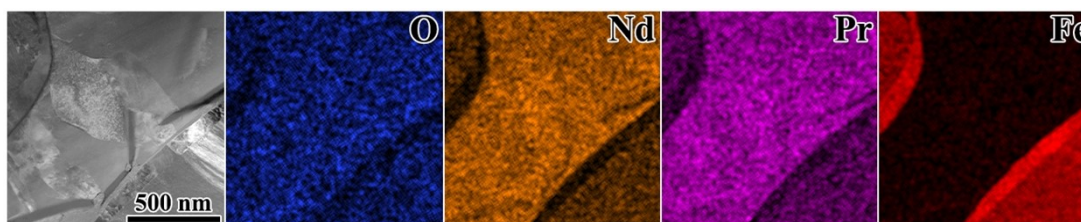

**Fig. S7** STEM-EDS mappings for the continuous grain boundary region obtained from **Fig. 9(a)**.

**Table S1.** Electrochemical parameters of the original and 0.5 h oxidized Nd–Fe–B magnets under different oxidation temperatures in 3.5% NaCl solution.

| Samples  | $E_{\text{corr}}$<br>(V) | $I_{\text{corr}}$<br>( $\mu\text{A}\cdot\text{cm}^{-2}$ ) | $R_s$<br>( $\Omega\cdot\text{cm}^2$ ) | $Q_c$<br>( $\text{F}\cdot\text{cm}^{-2}\cdot\text{s}^{n-1}$ ) | $n_c$ | $R_c$<br>( $\Omega\cdot\text{cm}^2$ ) | $Q_{\text{dl}}$<br>( $\text{F}\cdot\text{cm}^{-2}\cdot\text{s}^{n-1}$ ) | $n_{\text{dl}}$ | $R_{\text{ct}}$<br>( $\Omega\cdot\text{cm}^2$ ) | $L$<br>( $\text{H}\cdot\text{cm}^2$ ) | $R_L$<br>( $\Omega\cdot\text{cm}^2$ ) |
|----------|--------------------------|-----------------------------------------------------------|---------------------------------------|---------------------------------------------------------------|-------|---------------------------------------|-------------------------------------------------------------------------|-----------------|-------------------------------------------------|---------------------------------------|---------------------------------------|
| Original | -0.911                   | 31.2                                                      | 28.6                                  | /                                                             | /     | /                                     | $2.82\times 10^{-4}$                                                    | 0.710           | 1450                                            | 1558                                  | 594                                   |
| 250 °C   | -0.852                   | 10.8                                                      | 30.7                                  | $1.06\times 10^{-4}$                                          | 0.773 | 12.2                                  | $6.87\times 10^{-5}$                                                    | 0.788           | 2527                                            | /                                     | /                                     |
| 350 °C   | -0.854                   | 7.3                                                       | 31.6                                  | $2.45\times 10^{-4}$                                          | 0.812 | 22.1                                  | $4.87\times 10^{-9}$                                                    | 0.775           | 4584                                            | /                                     | /                                     |
| 450 °C   | -0.808                   | 9.3                                                       | 31.9                                  | $1.25\times 10^{-4}$                                          | 0.770 | 62.14                                 | $1.06\times 10^{-4}$                                                    | 0.763           | 3328                                            | /                                     | /                                     |
| 550 °C   | -0.808                   | 10                                                        | 32.5                                  | $1.06\times 10^{-4}$                                          | 0.766 | 277.8                                 | $2.26\times 10^{-4}$                                                    | 0.769           | 2748                                            | /                                     | /                                     |
| 650 °C   | -0.877                   | 21.4                                                      | 32.5                                  | $1.98\times 10^{-4}$                                          | 0.830 | 543.0                                 | $1.37\times 10^{-4}$                                                    | 0.882           | 1475                                            |                                       |                                       |

**Table S2.** Electrochemical parameters of the original and 3 h oxidized Nd–Fe–B magnets under different oxidation temperatures in 3.5% NaCl solution.

| Samples  | $E_{\text{corr}}$<br>(V) | $I_{\text{corr}}$<br>( $\mu\text{A}\cdot\text{cm}^{-2}$ ) | $R_s$<br>( $\Omega\cdot\text{cm}^2$ ) | $Q_c$<br>( $\text{F}\cdot\text{cm}^{-2}\cdot\text{s}^{n-1}$ ) | $n_c$ | $R_c$<br>( $\Omega\cdot\text{cm}^2$ ) | $Q_{\text{dl}}$<br>( $\text{F}\cdot\text{cm}^{-2}\cdot\text{s}^{n-1}$ ) | $n_{\text{dl}}$ | $R_{\text{ct}}$<br>( $\Omega\cdot\text{cm}^2$ ) | $L$<br>( $\text{H}\cdot\text{cm}^2$ ) | $R_L$<br>( $\Omega\cdot\text{cm}^2$ ) |
|----------|--------------------------|-----------------------------------------------------------|---------------------------------------|---------------------------------------------------------------|-------|---------------------------------------|-------------------------------------------------------------------------|-----------------|-------------------------------------------------|---------------------------------------|---------------------------------------|
| Original | -0.911                   | 31.2                                                      | 28.6                                  | /                                                             | /     | /                                     | $2.82\times 10^{-4}$                                                    | 0.710           | 1450                                            | 1558                                  | 594                                   |
| 250 °C   | -0.820                   | 7.6                                                       | 29.1                                  | $1.30\times 10^{-4}$                                          | 0.797 | 18.2                                  | $8.07\times 10^{-4}$                                                    | 0.838           | 3356                                            | /                                     | /                                     |
| 350 °C   | -0.840                   | 7.9                                                       | 35.5                                  | $1.36\times 10^{-4}$                                          | 0.742 | 23.3                                  | $3.75\times 10^{-4}$                                                    | 0.768           | 3273                                            | /                                     | /                                     |
| 450 °C   | -0.881                   | 26.0                                                      | 33.5                                  | $3.78\times 10^{-4}$                                          | 0.787 | 418.9                                 | $2.34\times 10^{-4}$                                                    | 0.861           | 1469                                            | /                                     | /                                     |
| 550 °C   | -0.884                   | 29.8                                                      | 37.8                                  | $1.71\times 10^{-4}$                                          | 0.718 | 100.9                                 | $9.46\times 10^{-4}$                                                    | 0.726           | 1059                                            | /                                     | /                                     |
| 650 °C   | -0.895                   | 38.1                                                      | 33.6                                  | $5.25\times 10^{-4}$                                          | 0.764 | 134.6                                 | $1.13\times 10^{-4}$                                                    | 0.785           | 547                                             | /                                     | /                                     |
